# Supplementary material for: CSF1R regulates schizophrenia-related stress response and vascular association of microglia/macrophages
Source: PubMed Central journal article supplement (PMC10403881; doi:10.1186/s12916-023-02959-8), 2023-08-04
Supplement: 12916_2023_2959_MOESM1_ESM.pdf [file 12916_2023_2959_MOESM1_ESM.pdf]

**Table S1: mouse gene qPCR primers**

| Gene (mouse)  | Primer  | Sequence              |
|---------------|---------|-----------------------|
| <i>Ang</i>    | Forward | CCAACAGGAAGGAAGGAGTGA |
|               | Reverse | CTGGGCTTATCGCCATCTCTT |
| <i>Csf1r</i>  | Forward | TGGCGAGGGTTCATTATCCG  |
|               | Reverse | CCAGCTTGCTAGGCTCCAAT  |
| <i>Cspg4</i>  | Forward | TAGGGAGCAGGCAAACGAAG  |
|               | Reverse | AAACTCAAACGACGCACAGC  |
| <i>Pik3cg</i> | Forward | GAAGGGAGCCCCAGAAAAGAG |
|               | Reverse | GTGATGCGGAGGAGGATCATT |
| <i>Ptk2b</i>  | Forward | CTACACGGAGTTCACAGGGC  |
|               | Reverse | TACACGAGGTCATCGGTCCT  |
| <i>Actin</i>  | Forward | ACTGAGCTGCGTTTTACACCC |
|               | Reverse | GCCTTCACCGTTCCAGTTTT  |

**Table S2: human blood DEGs**

| Symbols | logFC  | P.Value  | adj.P.Val |
|---------|--------|----------|-----------|
| FGF17   | 0,727  | 3,48E-06 | 1,03E-05  |
| CTSK    | 0,601  | 2,23E-11 | 2,95E-10  |
| APOE    | 0,524  | 0,000789 | 0,00156   |
| NOTCH1  | 0,4    | 1,10E-07 | 4,39E-07  |
| NDST1   | 0,35   | 4,10E-05 | 0,000101  |
| AKT1    | 0,345  | 4,84E-07 | 1,68E-06  |
| MAFB    | 0,321  | 7,77E-05 | 0,000182  |
| GNA11   | 0,321  | 6,89E-07 | 2,31E-06  |
| STAT5B  | 0,25   | 4,45E-06 | 1,29E-05  |
| KAT6A   | 0,174  | 0,005764 | 0,00988   |
| STAT3   | 0,168  | 0,002891 | 0,005193  |
| CSF1R   | -0,195 | 0,001794 | 0,003335  |
| PIK3CA  | -0,201 | 0,004873 | 0,008441  |
| GNAS    | -0,21  | 0,002965 | 0,00531   |
| MITF    | -0,298 | 0,002515 | 0,004565  |
| F13A1   | -0,319 | 0,002746 | 0,004952  |
| SLC26A2 | -0,322 | 5,90E-05 | 0,000141  |
| SLC7A7  | -0,333 | 7,96E-08 | 3,28E-07  |
| GNAQ    | -0,358 | 1,44E-05 | 3,81E-05  |
| PNP     | -0,39  | 2,01E-08 | 9,57E-08  |
| NFIA    | -0,485 | 6,34E-08 | 2,68E-07  |
| CFH     | -0,497 | 1,02E-05 | 2,79E-05  |
| TLR3    | -0,509 | 7,03E-08 | 2,93E-07  |
| PTEN    | -0,516 | 1,54E-10 | 1,44E-09  |
| ITGB3   | -0,536 | 0,000228 | 0,000492  |
| TNFSF11 | -0,721 | 2,64E-05 | 6,70E-05  |
| EGF     | -0,82  | 1,54E-07 | 5,95E-07  |
| NPM1    | -0,858 | 6,05E-11 | 6,63E-10  |

**Table S3: human blood DEGs\_GOBP**

| Pathway                                                          | Genes                                                                                                                                                                  | FDR      |
|------------------------------------------------------------------|------------------------------------------------------------------------------------------------------------------------------------------------------------------------|----------|
| regulation of developmental process                              | GNA11, APOE, PIK3CA, STAT3, EGF, CTSK, NOTCH1, CSF1R, GNAQ, STAT5B, MITF, TLR3, PNP, GNAS, PTEN, MAFB, TNFSF11, AKT1, ITGB3                                            | 3,64E-08 |
| regulation of cell differentiation                               | GNA11, APOE, STAT3, CTSK, NOTCH1, GNAQ, STAT5B, MITF, TLR3, PNP, GNAS, PTEN, MAFB, TNFSF11, AKT1, ITGB3                                                                | 1,63E-07 |
| regulation of protein phosphorylation                            | APOE, NDST1, PIK3CA, STAT3, EGF, NOTCH1, CSF1R, GNAQ, TLR3, NPM1, PTEN, TNFSF11, AKT1, ITGB3                                                                           | 1,02E-06 |
| transmembrane receptor protein tyrosine kinase signaling pathway | NDST1, PIK3CA, STAT3, EGF, CSF1R, STAT5B, FGF17, PTEN, AKT1, ITGB3                                                                                                     | 1,02E-06 |
| multicellular organismal process                                 | GNA11, APOE, NDST1, PIK3CA, STAT3, F13A1, EGF, CTSK, NOTCH1, SLC26A2, CSF1R, GNAQ, STAT5B, MITF, TLR3, FGF17, PNP, GNAS, NFIA, PTEN, MAFB, KAT6A, TNFSF11, AKT1, ITGB3 | 1,02E-06 |
| system development                                               | GNA11, APOE, NDST1, PIK3CA, STAT3, EGF, NOTCH1, CSF1R, GNAQ, STAT5B, MITF, TLR3, FGF17, GNAS, NFIA, PTEN, MAFB, KAT6A, TNFSF11, AKT1, ITGB3                            | 1,02E-06 |

**Table S4: mouse PFC DEGs**

| Celladhesion |       |          |           | Angiogenesis |       |          |           |
|--------------|-------|----------|-----------|--------------|-------|----------|-----------|
| Symbols      | logFC | P.Value  | adj.P.Val | Symbols      | logFC | P.Value  | adj.P.Val |
| Selplg       | -1,35 | 4,33E-20 | 1,83E-17  | Pik3cg       | -1,19 | 5,23E-18 | 1,59E-15  |
| Itgam        | -1,27 | 5,26E-18 | 1,59E-15  | Cspg4        | -0,75 | 2,09E-15 | 4,67E-13  |
| Csf3r        | -1,02 | 2,70E-12 | 3,07E-10  | Pde3b        | -0,49 | 1,67E-11 | 1,58E-09  |
| Itgb5        | -0,71 | 1,89E-14 | 3,42E-12  | Ang          | -0,94 | 1,29E-10 | 9,99E-09  |
| Negr1        | 0,44  | 3,31E-13 | 4,63E-11  | Prkd2        | -0,60 | 3,05E-10 | 2,14E-08  |
| Myh9         | -0,36 | 9,58E-13 | 1,23E-10  | Syk          | -0,71 | 1,20E-09 | 7,13E-08  |
| Parvg        | -0,77 | 6,75E-12 | 6,99E-10  | Ecscr        | -0,80 | 1,72E-09 | 9,61E-08  |
| Atp1b1       | 0,29  | 6,44E-11 | 5,44E-09  | Fmn13        | -0,51 | 6,22E-08 | 2,27E-06  |
| Prkd2        | -0,60 | 3,05E-10 | 2,14E-08  | Sema4a       | -0,35 | 1,28E-07 | 4,20E-06  |
| Cntn1        | 0,29  | 3,88E-10 | 2,66E-08  | S1pr1        | -0,28 | 2,99E-07 | 8,72E-06  |
| Pxn          | -0,36 | 4,55E-09 | 2,34E-07  | Ephb3        | -0,52 | 3,01E-07 | 8,75E-06  |
| Cdh2         | 0,31  | 4,58E-09 | 2,34E-07  | Ptk2b        | 0,25  | 9,81E-07 | 2,44E-05  |
| Siglece      | -0,85 | 5,29E-09 | 2,61E-07  | Mmp2         | -0,60 | 6,53E-06 | 0,000122  |
| Pcdha6       | 0,70  | 6,40E-08 | 2,33E-06  | Mfge8        | -0,29 | 2,37E-05 | 0,000358  |
| Cd33         | -0,75 | 8,89E-08 | 3,10E-06  | Shc1         | -0,23 | 3,46E-05 | 0,000491  |
| Arvcf        | -0,31 | 9,61E-08 | 3,32E-06  | Dab2ip       | -0,35 | 6,81E-05 | 0,000858  |
| Ackr3        | -0,41 | 1,04E-07 | 3,51E-06  | Thsd7a       | 0,44  | 0,000106 | 0,001224  |
| Cdh9         | 0,50  | 1,37E-07 | 4,47E-06  | Pdcd10       | 0,24  | 0,000108 | 0,001248  |
| Gp1bb        | -0,48 | 1,47E-07 | 4,75E-06  | Adam15       | -0,21 | 0,000116 | 0,001332  |
| Kitl         | 0,34  | 1,81E-07 | 5,65E-06  | Prkca        | 0,34  | 0,000297 | 0,002886  |
| Lpxn         | -0,72 | 3,05E-07 | 8,82E-06  | Angptl6      | -0,34 | 0,000492 | 0,00435   |
| Ctnnd1       | -0,26 | 4,76E-07 | 1,31E-05  | Apln         | -0,33 | 0,000552 | 0,004776  |
| Pcdhga2      | 0,37  | 1,90E-06 | 4,32E-05  | Col4a2       | -0,21 | 0,000678 | 0,005655  |
| Pcdhga4      | 0,38  | 2,92E-06 | 6,25E-05  | Cib1         | -0,28 | 0,000809 | 0,006503  |
| Cntnap2      | 0,38  | 4,26E-06 | 8,61E-05  | Pik3r6       | -0,36 | 0,001398 | 0,010071  |
| Itga4        | 0,39  | 6,09E-06 | 0,000115  | Angpt1       | 0,34  | 0,001471 | 0,010477  |
| Flrt3        | 0,41  | 6,69E-06 | 0,000124  | Xbp1         | -0,22 | 0,00148  | 0,010534  |
| Pcdhac2      | 0,29  | 8,32E-06 | 0,000148  | Sema3e       | 0,31  | 0,002255 | 0,014593  |
| Astn1        | 0,25  | 1,15E-05 | 0,000195  | Epas1        | -0,22 | 0,002337 | 0,014995  |
| Nuak1        | -0,38 | 1,21E-05 | 0,000202  | Cemip2       | 0,28  | 0,003651 | 0,021271  |
| Omg          | 0,25  | 1,40E-05 | 0,000229  | Tie1         | -0,23 | 0,003734 | 0,02169   |
| Pcdha7       | 0,54  | 1,53E-05 | 0,000249  | Jam3         | -0,21 | 0,00417  | 0,023665  |
| Cntn6        | 0,34  | 1,73E-05 | 0,000275  | Efnb2        | 0,21  | 0,004281 | 0,024089  |
| Mfge8        | -0,29 | 2,37E-05 | 0,000358  | Robo4        | -0,25 | 0,004358 | 0,024386  |
| Trip6        | -0,37 | 2,78E-05 | 0,000409  | Itgav        | 0,23  | 0,00599  | 0,031509  |
| Cadm2        | 0,24  | 2,82E-05 | 0,000413  | Acvr11       | -0,22 | 0,007264 | 0,036716  |
| Pcdhgb6      | 0,35  | 2,92E-05 | 0,000427  | Minar1       | 0,38  | 0,00889  | 0,042918  |
| Cd84         | -0,60 | 3,59E-05 | 0,000508  | Efna1        | -0,28 | 0,01063  | 0,049248  |
| Vcl          | -0,24 | 4,08E-05 | 0,000559  |              |       |          |           |
| Lgals3bp     | 0,58  | 4,11E-05 | 0,00056   |              |       |          |           |
| Fermt3       | -0,59 | 4,36E-05 | 0,000585  |              |       |          |           |
| Hepacam      | -0,23 | 8,05E-05 | 0,000983  |              |       |          |           |
| Nlgn1        | 0,27  | 8,89E-05 | 0,001068  |              |       |          |           |
| Chl1         | 0,34  | 9,63E-05 | 0,001142  |              |       |          |           |
| Adam15       | -0,21 | 0,000116 | 0,001332  |              |       |          |           |
| Dscaml1      | 0,33  | 0,000126 | 0,001422  |              |       |          |           |
| Reln         | 0,45  | 0,000139 | 0,001549  |              |       |          |           |

|          |       |          |          |
|----------|-------|----------|----------|
| Itga8    | 0,36  | 0,000143 | 0,001588 |
| Cd47     | 0,25  | 0,000154 | 0,001685 |
| Msl1l    | -0,50 | 0,000157 | 0,001713 |
| Cntn4    | 0,23  | 0,000171 | 0,001831 |
| Flrt2    | 0,33  | 0,000219 | 0,002262 |
| Itga9    | -0,39 | 0,000241 | 0,002451 |
| Pcdhga5  | 0,24  | 0,000249 | 0,002518 |
| Pcdhgc5  | 0,25  | 0,000255 | 0,002563 |
| Prkca    | 0,34  | 0,000297 | 0,002886 |
| Fat3     | 0,29  | 0,000299 | 0,002895 |
| Nrcam    | 0,21  | 0,000334 | 0,003167 |
| Pcdhb17  | 0,24  | 0,000349 | 0,003286 |
| Nphs1    | -0,49 | 0,00035  | 0,00329  |
| Lamb1    | 0,34  | 0,000358 | 0,003344 |
| Col16a1  | -0,21 | 0,000365 | 0,003397 |
| Pcdha5   | 0,43  | 0,000388 | 0,003574 |
| Cd36     | -0,49 | 0,0004   | 0,00366  |
| Pcdhb11  | 0,41  | 0,000588 | 0,005003 |
| Ssx2ip   | 0,22  | 0,0006   | 0,005099 |
| Tenm3    | 0,50  | 0,000643 | 0,005408 |
| Cib1     | -0,28 | 0,000809 | 0,006503 |
| Cntnap5a | 0,42  | 0,000839 | 0,006706 |
| Lama1    | 0,47  | 0,0009   | 0,007093 |
| Tyro3    | -0,22 | 0,000904 | 0,007119 |
| Inpp1    | -0,24 | 0,000955 | 0,007433 |
| Cntn5    | 0,43  | 0,001037 | 0,007934 |
| Pcdhb22  | 0,32  | 0,001069 | 0,008122 |
| Cdh8     | 0,36  | 0,001078 | 0,00817  |
| Pcdhb14  | 0,33  | 0,00123  | 0,009067 |
| Itgb2    | -0,46 | 0,00129  | 0,009408 |
| Postn    | 0,43  | 0,001426 | 0,010228 |
| Ccn1     | -0,45 | 0,001471 | 0,010477 |
| Pcdh15   | -0,32 | 0,00157  | 0,011037 |
| Cd44     | 0,38  | 0,001837 | 0,012509 |
| Pcdhb12  | 0,30  | 0,001876 | 0,012711 |
| Edil3    | 0,20  | 0,002202 | 0,014338 |
| Pcdhga12 | 0,21  | 0,002227 | 0,014457 |
| Pcdhb18  | 0,27  | 0,002318 | 0,014919 |
| Col13a1  | 0,44  | 0,002371 | 0,015144 |
| Cntnap3  | 0,43  | 0,002402 | 0,015308 |
| Spp1     | 0,44  | 0,002586 | 0,016242 |
| Cdh13    | 0,31  | 0,002884 | 0,017683 |
| Pcdhga9  | 0,28  | 0,00291  | 0,017797 |
| Pip5k1c  | -0,26 | 0,003179 | 0,019156 |
| Pcdh17   | 0,32  | 0,0032   | 0,019244 |
| Scarf1   | -0,28 | 0,003462 | 0,020399 |
| Pcdhb21  | 0,43  | 0,003512 | 0,020617 |
| Pcdhga10 | 0,27  | 0,003516 | 0,020631 |
| Pcdhgb1  | 0,28  | 0,004054 | 0,023167 |
| Jam3     | -0,21 | 0,00417  | 0,023665 |

|         |       |          |          |
|---------|-------|----------|----------|
| Pcdhb7  | 0,23  | 0,004593 | 0,02548  |
| Pcdhb20 | 0,22  | 0,005107 | 0,027715 |
| Cntnap4 | 0,31  | 0,005176 | 0,028018 |
| Tnr     | 0,35  | 0,005803 | 0,030717 |
| Itgav   | 0,23  | 0,00599  | 0,031509 |
| Pcdh19  | 0,28  | 0,006454 | 0,033415 |
| Ncam2   | 0,39  | 0,006651 | 0,034224 |
| Cgref1  | 0,27  | 0,006995 | 0,035671 |
| Col15a1 | 0,38  | 0,0076   | 0,037997 |
| Pcdha3  | 0,33  | 0,007668 | 0,038263 |
| Col6a4  | 0,39  | 0,007808 | 0,038783 |
| Siglecg | -0,26 | 0,007958 | 0,03937  |
| Amigo3  | -0,22 | 0,009125 | 0,04373  |
| Alcam   | 0,22  | 0,009252 | 0,044179 |
| Boc     | -0,28 | 0,009703 | 0,045895 |
| Cdh12   | 0,27  | 0,010084 | 0,047293 |
| Comp    | -0,35 | 0,010159 | 0,047562 |
| Pcdha9  | 0,30  | 0,010553 | 0,048935 |

**Table S5: mouse PFC DEGs\_GOBP**

| Pathway       | Genes                                                                                                                                                                                                                                                                                                                                                                                                                                                                                                                                                                                                                                                                                                                                                                                                                                                                                        | FDR     |
|---------------|----------------------------------------------------------------------------------------------------------------------------------------------------------------------------------------------------------------------------------------------------------------------------------------------------------------------------------------------------------------------------------------------------------------------------------------------------------------------------------------------------------------------------------------------------------------------------------------------------------------------------------------------------------------------------------------------------------------------------------------------------------------------------------------------------------------------------------------------------------------------------------------------|---------|
|               | CD84, COL16A1, CSF3R, CTNND1, INPPL1, CIB1, CDH9, CDH8, COMP, ALCAM, CDH2, CNTNAP5A, TNR, NRCAM, CCN1, PCDHAC2, POSTN, OMG, PRKCA, ATP1B1, ADAM15, TYRO3, PRKD2, VCL, ASTN1, COL13A1, HEPACAM, PXN, PCDH15, PCDH19, PCDH17, NUAK1, FLRT2, FLRT3, PCDHA5, LPXN, PCDHA3, PIP5K1C, PCDHA9, PCDHA7, PCDHA6, CNTN5, CNTN6, CADM2, PCDHGA10, PCDHGA12, PARVG, KITL, TRIP6, CNTN1, FAT3, CNTN4, FERMT3, PCDHB7, CNTNAP3, LGALS3BP, CNTNAP2, PCDHGB6, ITGAM, TENM3, ITGB5, ITGB2, SIGLECG, SIGLECE, CHL1, BOC, ITGAV, CD36, EDIL3, SCARF1, CD33, PCDHGA5, ITGA4, PCDHGA4, GP1BB, PCDHGA2, PCDHGA9, PCDHGB1, ITGA8, CDH12, COL6A4, CDH13, MYH9, CD47, MFGE8, SSX2IP, DSCAML1, CD44, CNTNAP4, ITGA9, COL15A1, NLGN1, SELPLG, AMIGO3, LAMA1, MSLNL, PCDHB22, PCDHB21, PCDHB20, ARVCF, RELN, SPP1, NCAM2, JAM3, CGREF1, NEGR1, PCDHGC5, PCDHB14, LAMB1, PCDHB12, PCDHB11, NPHS1, PCDHB18, PCDHB17, ACKR3 |         |
| Cell adhesion |                                                                                                                                                                                                                                                                                                                                                                                                                                                                                                                                                                                                                                                                                                                                                                                                                                                                                              | 6,2E-10 |
|               | ACVRL1, ROBO4, SHC1, EPAS1, PDE3B, ECSCR, CIB1, SEMA3E, PIK3R6, PIK3CG, EFNB2, PDCD10, S1PR1, PTK2B, ITGAV, THSD7A, EPHB3, JAM3, MINAR1, SEMA4A, XBP1, ANGPT1, SYK, CEMIP2, TIE1, MMP2, DAB2IP, PRKCA, APLN, EFNA1, FMNL3, COL4A2, ADAM15, ANGPTL6, ANG, PRKD2, CSPG4, MFGE8                                                                                                                                                                                                                                                                                                                                                                                                                                                                                                                                                                                                                 |         |
| Angiogenesis  |                                                                                                                                                                                                                                                                                                                                                                                                                                                                                                                                                                                                                                                                                                                                                                                                                                                                                              | 3,6E-04 |

RB1, SPI1, MYT1L, CCNH, NEXMIF, SCX, IKZF1, SOX21, ELK3, SOX3, SOX17, SOX18, GPBP1, DPF1, KAT7, SOX8, CCNL2, IER5, JUNB, MEF2A, SP110, SOX13, RFX3, EBF3, RFX1, SOX10, OVOL2, RUNX1, JMJD6, ZFP292, DDIT3, XRN2, BTK, TXNIP, BCORL1, ZFPM1, L3MBTL1, DHX9, EPAS1, ZFP507, HIF1A, DEDD2, MIER2, DHX36, HIVEP1, ZSCAN12, ZBTB7B, PPARGC1A, BANP, MCTS1, EGR1, EGR2, XBP1, JUND, EGR3, EGR4, BCL11B, FOXF2, NFATC3, TRIP4, IRF2BP2, NFATC1, NR1D1, SMARCA1, PBX1, FLI1, NR2F6, POU6F1, HNRNPK, ZBTB6, ID2, ID1, TRIP6, ID3, NOL11, IFI27L2A, MESP2, CSRN1, TENM1, RARG, ZFP488, ELL, BHLHE41, LIMD1, GLI1, GLI2, ZFP385A, ZFP366, PBRM1, BATF3, NCOA3, PROX2, IL16, PPHLN1, SIRT7, BAZ1A, PPRC1, CBFA2T3, ZHX1, SIRT2, MN1, TOX3, ZEB2, MED25, RARA, NCOA7, PPARA, PPAR, ELOF1, RELA, TCEAL7, PURA, SERTAD3, BCLAF1, SERTAD1, SERTAD2, TCEAL1, LEO1, SUZ12, ZFP710, PCGF6, STAT1, PCGF2, NR1H2, YLPM1, UNCX, LRPPRC, GATAD2A, PER2, PER1, NR6A1, NFIC, TCEA1, PKN1, SUPT16, ZFP276, CRT2, NAB2, CTNND1, HR, ETS1, LOXL2, NR3C2, FOXQ1, CCND3, KMT5A, ZFP37, ZFP39, ZFP579, TLE3, ZFP335, TLE2, ZGPAT, ZFP219, KMT5C, LMO3, ARID5A, ZBTB33, GTF2F2, POU3F3, RSB1, HIC1, TLE6, NPAS4, HIC2, MAF, PSPC1, KAT6B, ZFP692, ZFP691, LRIF1, KHDRBS1, KHDRBS2, AKNA, CREM, FOXO6, FOXO4, NPAS1, GTF2E1, GLIS2, ATXN3, ZKSCAN8, ZKSCAN3, SAFB2, NLRP3, LPXN, E4F1, TFAP2D, ZFH2, CBX3, SMAD9, ESRG, POU2F2, ESR1, ZFH4, HOPX, NFKB1, SCRT1, SMAD7, NR4A1, MLXIPL, MRGBP, NR4A3, MAFB, SP2, CNOT1, LHX2, SP4, BHLHE40, NFE2L2, MXD4, PHF19, RNF10, ZFP523, KDM5D,

Transcription regulation

3,6E-04



|                 |                                                                                                                                                                                                                                                                                                                                                                                                                                                                                                                                                                                                                                                                                                                                                                                                                                                                                                                                                                                                                                                                                                                                                                                                                                                                                                                                                                                                                                                                                                                                                                                 |         |
|-----------------|---------------------------------------------------------------------------------------------------------------------------------------------------------------------------------------------------------------------------------------------------------------------------------------------------------------------------------------------------------------------------------------------------------------------------------------------------------------------------------------------------------------------------------------------------------------------------------------------------------------------------------------------------------------------------------------------------------------------------------------------------------------------------------------------------------------------------------------------------------------------------------------------------------------------------------------------------------------------------------------------------------------------------------------------------------------------------------------------------------------------------------------------------------------------------------------------------------------------------------------------------------------------------------------------------------------------------------------------------------------------------------------------------------------------------------------------------------------------------------------------------------------------------------------------------------------------------------|---------|
| Transcription   | <p>RB1, SPI1, MYT1L, CCNH, NEXMIF, SCX, IKZF1, SOX21, ELK3, SOX3, SOX17, SOX18, GPBP1, DPF1, KAT7, SOX8, CCNL2, IER5, JUNB, MEF2A, SP110, SOX13, RFX3, EBF3, RFX1, SOX10, OVOL2, RUNX1, JMJD6, ZFP292, DDIT3, XRN2, BTK, TXNIP, BCORL1, ZFPM1, L3MBTL1, DHX9, EPAS1, ZFP507, HIF1A, DEDD2, MIER2, HLTF, DHX36, HIVEP1, ZSCAN12, ZBTB7B, PPARGC1A, BANP, MCTS1, EGR1, EGR2, XBP1, JUND, EGR3, EGR4, BCL11B, FOXF2, NFATC3, TRIP4, IRF2BP2, NFATC1, NR1D1, SMARCA1, PBX1, FLI1, NR2F6, POU6F1, HNRNPK, ZBTB6, ID2, ID1, TRIP6, ID3, NOL11, IFI27L2A, MESP2, CSRNP1, TENM1, RARG, ZFP488, ELL, BHLHE41, LIMD1, GLI1, GLI2, ZFP385A, ZFP366, PBRM1, BATF3, NCOA3, PROX2, IL16, PPHLN1, SIRT7, BAZ1A, PPRC1, CBFA2T3, ZHX1, SIRT2, MN1, TOX3, ZEB2, MED25, RARA, NCOA7, PPARA, PPARD, ELOF1, PRIM1, RELA, TCEAL7, PURA, SERTAD3, BCLAF1, SERTAD1, SERTAD2, TCEAL1, LEO1, SUZ12, ZFP710, PCGF6, STAT1, PCGF2, NR1H2, YLPM1, UNCX, LRPPRC, GATAD2A, PER2, PER1, NR6A1, NFIC, TCEA1, PKN1, SUPT16, ZFP276, CRTC2, NAB2, CTNND1, HR, ETS1, LOXL2, NR3C2, FOXQ1, CCND3, KMT5A, ZFP37, ZFP39, ZFP579, TLE3, ZFP335, TLE2, ZGPAT, ZFP219, KMT5C, LMO3, ARID5A, ZBTB33, GTF2F2, POU3F3, RSNB1, HIC1, TLE6, NPAS4, HIC2, MAF, PSPC1, KAT6B, ZFP692, ZFP691, LRIF1, KHDRBS1, KHDRBS2, AKNA, ZCCHC9, CREM, FOXO6, FOXO4, NPAS1, GTF2E1, GLIS2, ATXN3, ZKSCAN8, ZKSCAN3, SAFB2, NLRP3, LPXN, E4F1, TFAP2D, ZFHX2, CBX3, SMAD9, ESRRG, POU2F2, ESR1, ZFHX4, HOPX, NFKB1, SCRT1, SMAD7, NR4A1, MLXIPL, MRGBP, NR4A3, MAFB, SP2, CNOT1, LHX2, SP4, BHLHE40, NFE2L2, MXD4, PHF19, RNF10, ZFP523,</p> | 6,6E-04 |
| Innate immunity | <p>CD84, DDX3X, CYBC1, CLEC4N, PIK3CD, SIGLECG, PYCARD, C4B, TRIM8, SENP7, C4A, CLEC5A, DHX15, TNFAIP8L2, JAK3, HAVCR2, ZBP1, MAP4K2, TGTP2, FCER1G, SYK, SP110, ARID5A, TICAM1, MPEG1, IL17RA, FCGR1, HCK, NAIP5, TRAF4, IRF3, NAIP6, TMEM33, PSPC1, ADGRB1, BTK, TRIM14, MATR3, IRF5, TLR7, TLR6, RNF166, TLR13, TLR2, C1QB, CX3CR1, USP14, CSF1R, C1QA, NLRP1B, CLEC4A2, NLRX1, NLRP1A, DHX9, UNC93B1, PLD4, CFP, INAVA, CLEC7A, TIFA, DHX36, G3BP2, NLRP3, CD14, SLC15A4, GSDMD, LYN, CARD9, LY86, DAB2IP, MFHAS1, STING1, TBKBP1, C1QC</p>                                                                                                                                                                                                                                                                                                                                                                                                                                                                                                                                                                                                                                                                                                                                                                                                                                                                                                                                                                                                                                 | 7,8E-04 |
